# Supplementary material
Source: PubMed Central journal article supplement (PMC3684450)

**Supplemental Figure S1.** Bio-GPS analysis of SGK3 expression in human tissues.

**Supplemental Figure S2.** Boxplots of SGK3 expression in breast tumors from the Hatzis dataset classified by PAM50 molecular subtype. Line bars indicate groups statistically different (Wilcoxon Test). \*  $p < 0.005$ , \*\*  $p < 0.001$ , \*\*\*  $p < 0.0001$

Supplemental Figure S1

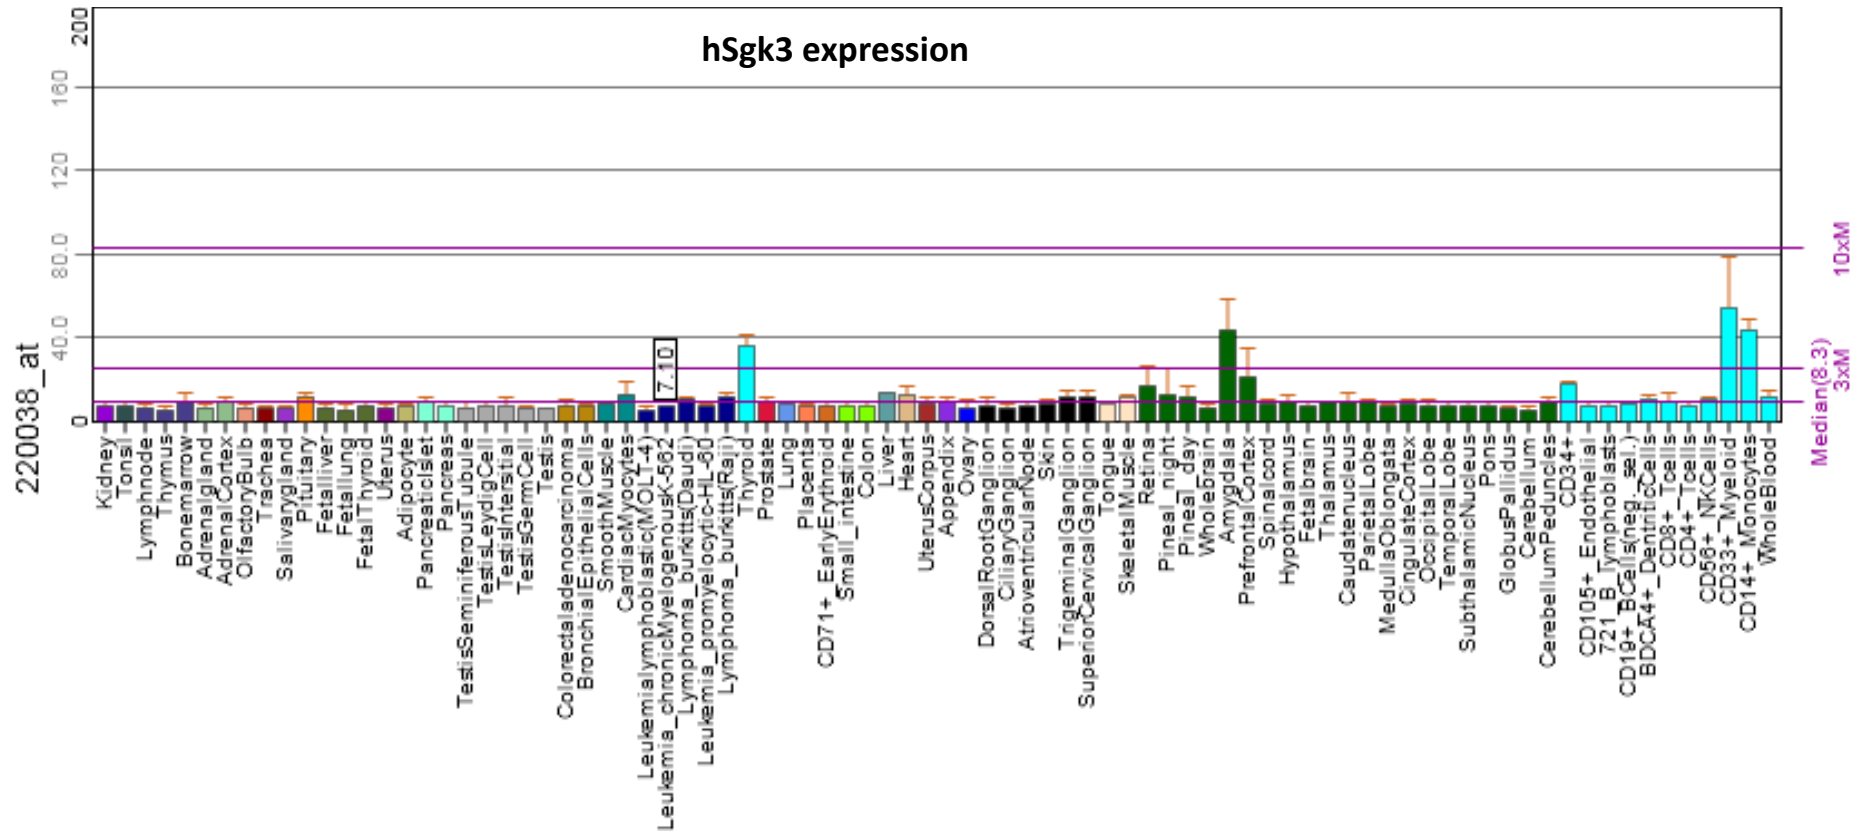

Supplemental Figure S2

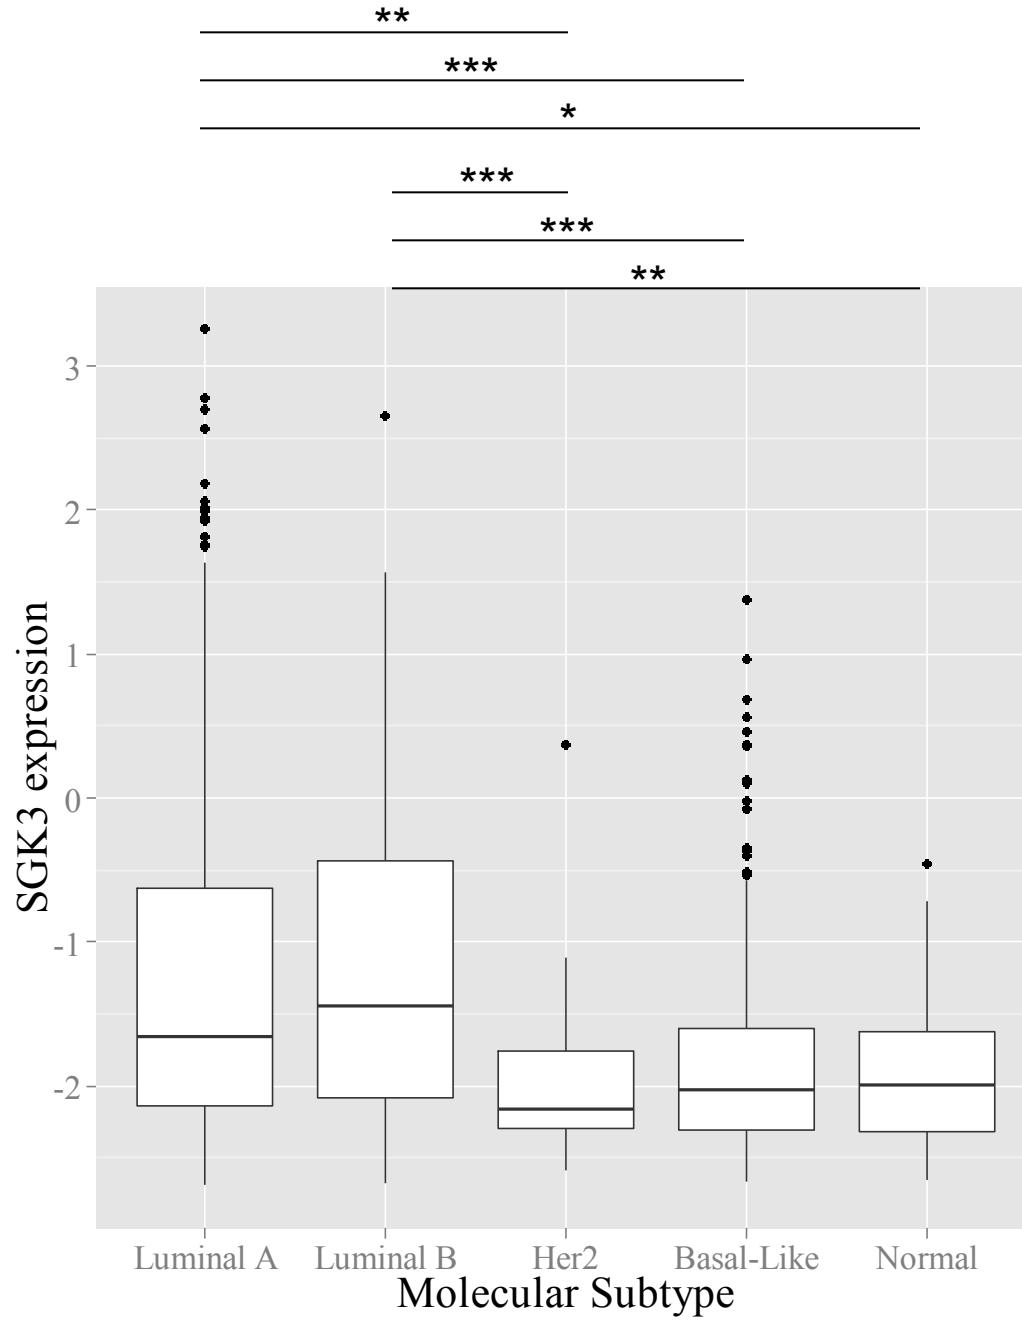

Supplement: NIHMS470135-supplement-01.pdf [file NIHMS470135-supplement-01.pdf]
